# Supplementary material
Source: HighWire-hosted journal article supplement (https://jnm.snmjournals.org/highwire/filestream/110090/field_highwire_adjunct_files/0/263926_Supplemental_Data.pdf)
Supplement: 263926_Supplemental_Data.pdf [file 263926_Supplemental_Data.pdf]

**Supplemental Table 1. "True" values (for each parameter) based on clinical data determined for each condition for the simulations.** All micro/macro-parameters were estimated using simplified reference tissue model. SCD = subjective cognitive decline. AD = Alzheimer's disease.  $BP_{ND}$  = binding potential.

|                               | $BP_{ND}$ | $k_2$ | $R_1$ |
|-------------------------------|-----------|-------|-------|
| <b>SCD: almost no binding</b> | 0.05      | 0.05  | 0.91  |
| <b>AD: low binding</b>        | 0.11      | 0.04  | 0.89  |
| <b>AD: medium binding</b>     | 0.21      | 0.03  | 0.85  |
| <b>AD: high binding</b>       | 0.32      | 0.08  | 0.88  |

**Supplemental Table 2. [ $^{18}F$ ]flortaucipir DVR, SUVR and  $R_1$  values for amyloid negative (A-) SCD subjects.** Mean  $\pm$  SD are provided. SCD = subjective cognitive decline. AD = Alzheimer's disease. DVR = distribution volume ratio (= binding potential ( $BP_{ND}$ ) + 1). SUVR = standardized uptake value ratio.

| A-<br>SCD (n=26) | DVR           |                            |             | SUVR <sub>80-100</sub>     |                             |             | $R_1$         |                            |             |
|------------------|---------------|----------------------------|-------------|----------------------------|-----------------------------|-------------|---------------|----------------------------|-------------|
|                  | BL            | FU                         | %change     | BL                         | FU                          | %change     | BL            | FU                         | %change     |
| Braak I/II       | 1.001 (0.083) | 1.023 <sup>z</sup> (0.091) | 2.26 (2.16) | 1.084 <sup>a</sup> (0.116) | 1.10 <sup>ax</sup> (0.111)  | 1.57 (2.74) | 0.712 (0.045) | 0.721 <sup>x</sup> (0.048) | 1.24 (2.79) |
| Braak III/IV     | 1.015 (0.035) | 1.037 <sup>z</sup> (0.032) | 2.24 (1.73) | 1.062 <sup>a</sup> (0.057) | 1.082 <sup>az</sup> (0.051) | 1.92 (2.38) | 0.841 (0.038) | 0.849 <sup>x</sup> (0.044) | 0.92 (2.28) |
| Braak V/VI       | 1.020 (0.036) | 1.036 <sup>z</sup> (0.030) | 1.61 (2.03) | 1.046 <sup>a</sup> (0.047) | 1.060 <sup>ax</sup> (0.040) | 1.39 (2.87) | 0.936 (0.043) | 0.939 (0.050)              | 0.35 (2.52) |

DVR vs. SUVR: <sup>a</sup>p<0.001 | BL vs. FU: <sup>x</sup>p<0.05, <sup>y</sup>p<0.01, <sup>z</sup>p<0.001 | %change DVR vs. %change SUVR: n.s.

**Supplemental Table 3. [<sup>18</sup>F]flortaucipir DVR, SUVR and R<sub>1</sub> values for amyloid positive (A+) SCD subjects.** Mean ± SD are provided. SCD = subjective cognitive decline. AD = Alzheimer’s disease. DVR = distribution volume ratio ( = binding potential (BP<sub>ND</sub>) + 1 ). SUVR = standardized uptake value ratio.

| A+<br>SCD (n=12) | DVR           |                            |             | SUVR <sub>80-100</sub>     |                             |             | R <sub>1</sub> |               |              |
|------------------|---------------|----------------------------|-------------|----------------------------|-----------------------------|-------------|----------------|---------------|--------------|
|                  | BL            | FU                         | %change     | BL                         | FU                          | %change     | BL             | FU            | %change      |
| Braak I/II       | 1.122 (0.151) | 1.158 <sup>x</sup> (0.166) | 3.22 (4.01) | 1.243 <sup>a</sup> (0.189) | 1.272 <sup>a</sup> (0.184)  | 2.45 (4.28) | 0.700 (0.029)  | 0.698 (0.051) | -0.36 (5.76) |
| Braak III/IV     | 1.110 (0.095) | 1.158 <sup>y</sup> (0.137) | 4.08 (3.52) | 1.189 <sup>a</sup> (0.128) | 1.235 <sup>ay</sup> (0.154) | 3.67 (2.87) | 0.824 (0.030)  | 0.829 (0.041) | 0.51 (3.66)  |
| Braak V/VI       | 1.090 (0.066) | 1.134 <sup>y</sup> (0.100) | 3.90 (3.55) | 1.140 <sup>a</sup> (0.091) | 1.185 <sup>ay</sup> (0.118) | 3.85 (3.62) | 0.904 (0.035)  | 0.911 (0.042) | 0.75 (3.07)  |

DVR vs. SUVR: <sup>a</sup>p<0.001 | BL vs. FU: <sup>x</sup>p<0.05, <sup>y</sup>p<0.01 | %change DVR vs. %change SUVR: n.s.

**Supplemental Table 4. Percentage overestimation of SUVR<sub>80-100</sub> relative to DVR.** Mean ± SD are provided. SCD = subjective cognitive decline. AD = Alzheimer’s disease. DVR = distribution volume ratio ( = binding potential (BP<sub>ND</sub>) + 1 ). SUVR = standardized uptake value ratio.

|                     | SCD         |             | AD           |              |
|---------------------|-------------|-------------|--------------|--------------|
|                     | BL          | FU          | BL           | FU           |
| <b>Braak I/II</b>   | 8.95 (3.92) | 8.16 (3.39) | 11.49 (3.46) | 11.18 (3.21) |
| <b>Braak III/IV</b> | 5.34 (3.02) | 4.97 (2.67) | 8.59 (3.04)  | 9.47 (3.29)  |
| <b>Braak V/VI</b>   | 3.19 (2.35) | 3.00 (1.98) | 7.08 (3.59)  | 7.97 (3.47)  |

**Supplemental Table 5. Annualized %change for [<sup>18</sup>F]flortaucipir DVR and SUVR<sub>80-100</sub> in SCD subjects.** Mean ± SD are provided. SCD = subjective cognitive decline. AD = Alzheimer's disease. DVR = distribution volume ratio ( = binding potential (BP<sub>ND</sub>) + 1 ). SUVR = standardized uptake value ratio.

| <b>SCD (n=38)</b>   | <b>Annualized %change DVR</b> | <b>Annualized %change SUVR<sub>80-100</sub></b> |
|---------------------|-------------------------------|-------------------------------------------------|
| <b>Braak I/II</b>   | 1.27 (1.44)                   | 0.92 (1.62)                                     |
| <b>Braak III/IV</b> | 1.41 (1.31)                   | 1.23 (1.32)                                     |
| <b>Braak V/VI</b>   | 1.16 (1.38)                   | 1.08 (1.61)                                     |

**Supplemental Table 6. Annualized %change for [<sup>18</sup>F]flortaucipir DVR and SUVR<sub>80-100</sub> values in AD patients.** Mean ± SD are provided. SCD = subjective cognitive decline. AD = Alzheimer's disease. DVR = distribution volume ratio ( = binding potential (BP<sub>ND</sub>) + 1 ). SUVR = standardized uptake value ratio.

| <b>AD (n=24)</b>    | <b>Annualized %change DVR</b> | <b>Annualized %change SUVR<sub>80-100</sub></b> |
|---------------------|-------------------------------|-------------------------------------------------|
| <b>Braak I/II</b>   | 1.54 (1.77)                   | 1.42 (2.35)                                     |
| <b>Braak III/IV</b> | 2.86 (2.13)                   | 3.23 (2.51)                                     |
| <b>Braak V/VI</b>   | 3.15 (2.65)                   | 3.53 (3.01)                                     |

**Supplemental Table 7. Required sample sizes (n) for [<sup>18</sup>F]flortaucipir for different effect sizes.** The differences between two dependent means (matched pairs) was calculated, with an  $\alpha$  (error probability) of 0.05 and a power (1- $\beta$  error probability) of 0.80. To adhere to the typical duration of clinical trials in AD we calculated percentage change over an 18 month period and used those standard deviations as input for the sample size calculations. Calculations were performed using GPower v3.1.9.7. SCD = subjective cognitive decline. AD = Alzheimer's disease. DVR = distribution volume ratio. SUVr = standardized uptake value ratio.

| SCD                    |              |     |     |    |    |    |    |    |    |    |     |   |
|------------------------|--------------|-----|-----|----|----|----|----|----|----|----|-----|---|
| Expected change        | 0.5%         | 1%  | 2%  | 3% | 4% | 5% | 6% | 7% | 8% | 9% | 10% |   |
| DVR                    | Braak I/II   | 141 | 37  | 11 | 7  | 5  | 4  | 4  | 3  | 3  | 3   | 3 |
|                        | Braak III/IV | 117 | 31  | 10 | 6  | 5  | 4  | 4  | 3  | 3  | 3   | 3 |
|                        | Braak V/VI   | 131 | 34  | 11 | 6  | 5  | 4  | 4  | 3  | 3  | 3   | 3 |
| SUVr <sub>80-100</sub> | Braak I/II   | 180 | 47  | 14 | 8  | 6  | 5  | 4  | 4  | 3  | 3   | 3 |
|                        | Braak III/IV | 119 | 32  | 10 | 6  | 5  | 4  | 4  | 3  | 3  | 3   | 3 |
|                        | Braak V/VI   | 177 | 46  | 13 | 8  | 5  | 5  | 4  | 4  | 3  | 3   | 3 |
| AD                     |              |     |     |    |    |    |    |    |    |    |     |   |
| Expected change        | 0.5%         | 1%  | 2%  | 3% | 4% | 5% | 6% | 7% | 8% | 9% | 10% |   |
| DVR                    | Braak I/II   | 223 | 58  | 16 | 9  | 6  | 5  | 4  | 4  | 4  | 3   | 3 |
|                        | Braak III/IV | 324 | 83  | 23 | 12 | 8  | 6  | 5  | 4  | 4  | 4   | 4 |
|                        | Braak V/VI   | 497 | 126 | 33 | 16 | 10 | 8  | 6  | 5  | 5  | 4   | 4 |
| SUVr <sub>80-100</sub> | Braak I/II   | 391 | 100 | 27 | 13 | 9  | 7  | 5  | 5  | 4  | 4   | 4 |
|                        | Braak III/IV | 446 | 113 | 30 | 15 | 10 | 7  | 6  | 5  | 5  | 4   | 4 |
|                        | Braak V/VI   | 641 | 162 | 42 | 20 | 13 | 9  | 7  | 6  | 5  | 5   | 4 |

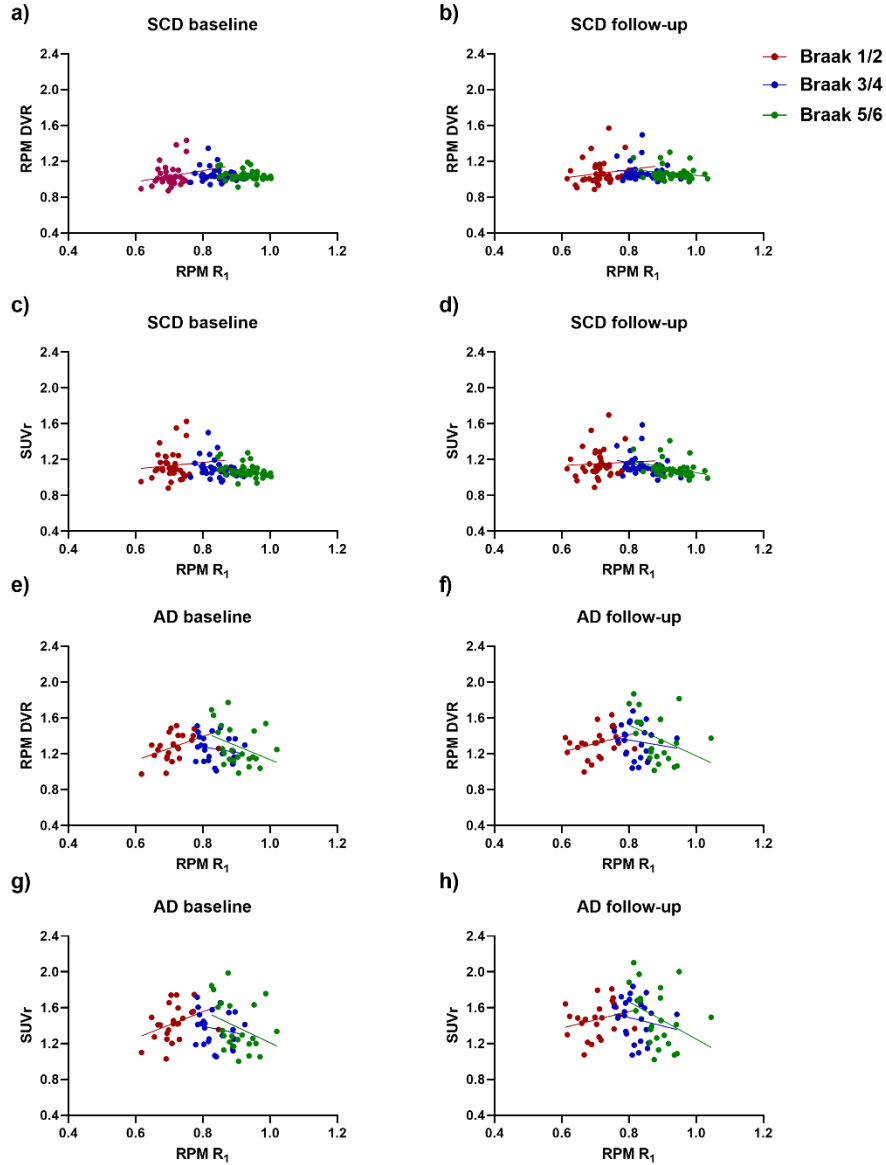

**Supplemental Figure 1. Correlation plots for [<sup>18</sup>F]flortaucipir DVR/SUVr and R<sub>1</sub>.** No significant correlation between [<sup>18</sup>F]flortaucipir DVR or SUVr and R<sub>1</sub> was observed in both SCD and AD groups, at both timepoints, in all regions. SCD = subjective cognitive decline. AD = Alzheimer's disease. RPM = receptor parametric mapping. DVR = distribution volume ratio (= binding potential (BP<sub>ND</sub>) + 1). SUVr = standardized uptake value ratio.

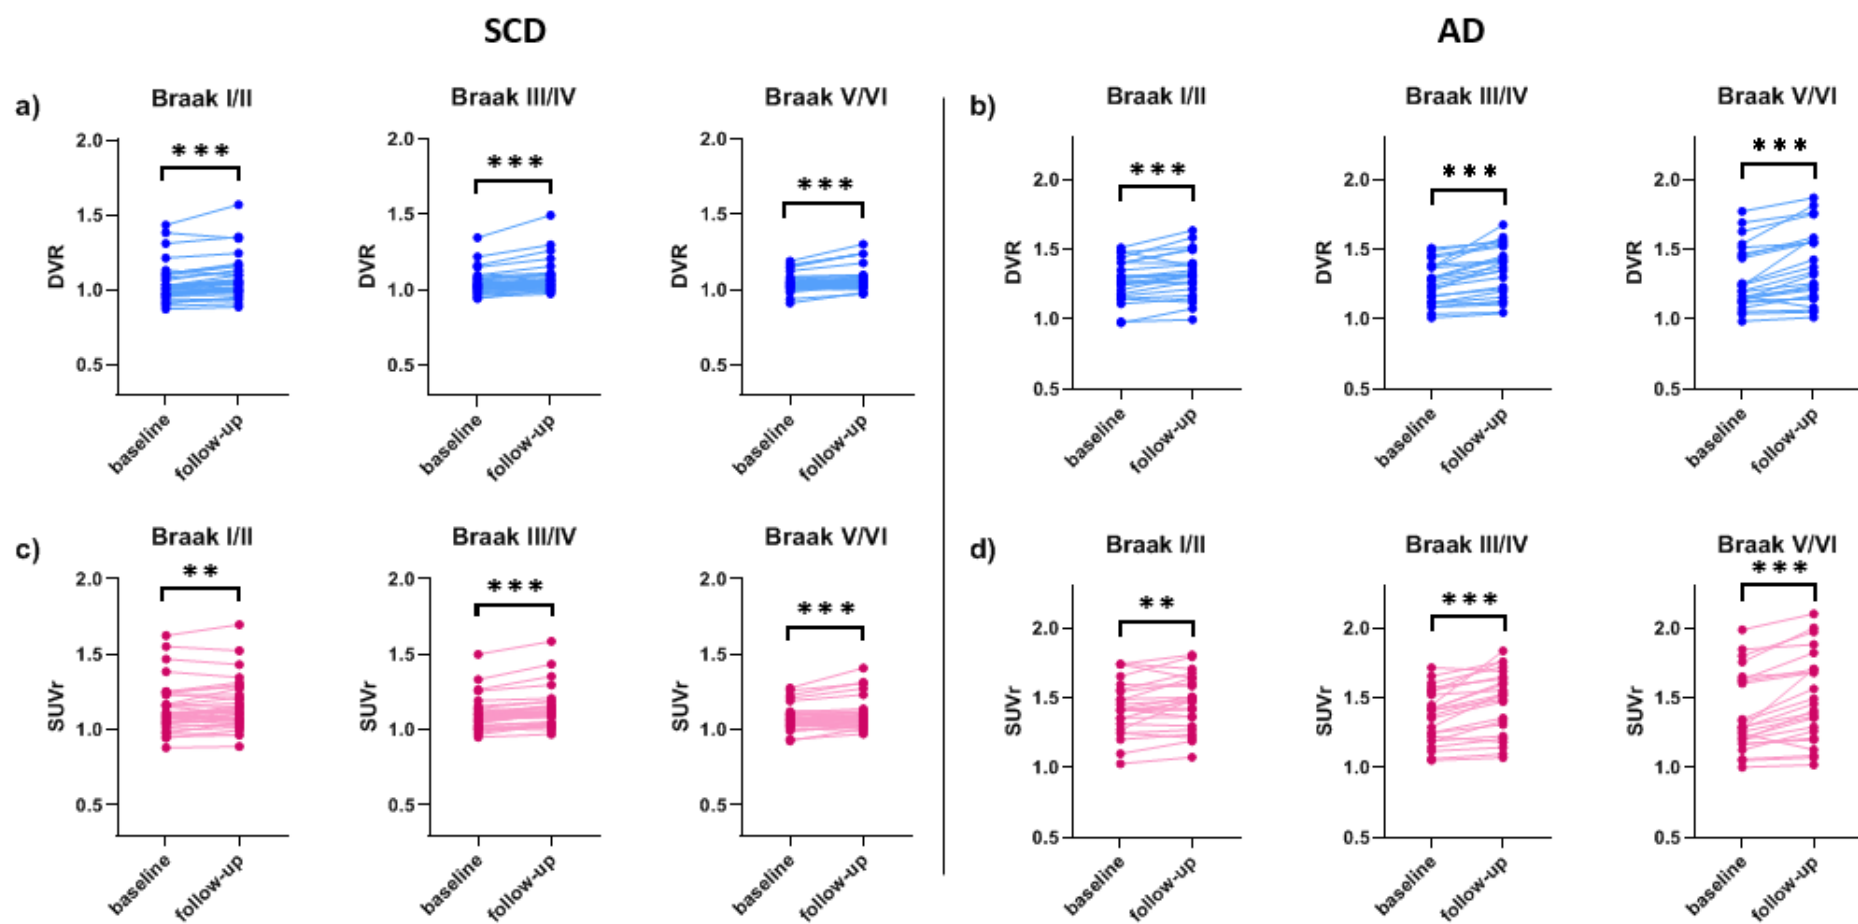

**Supplemental Figure 2.** Spaghetti plots of regional DVR in **(a)** SCD and **(b)** AD. Spaghetti plots of regional  $SUVR_{80-100}$  in **(c)** SCD and **(d)** AD. SCD = subjective cognitive decline. AD = Alzheimer's disease. DVR = distribution volume ratio (= binding potential ( $BP_{ND}$ ) + 1). SUVR = standardized uptake value ratio. \*\* $p < 0.01$ , \*\*\* $p < 0.001$
